# Supplementary material for: Gold(iii) derivatives as the noncovalent interaction donors: theoretical study of the π-hole regium bonds
Source: Royal Society of Chemistry journal article supplement (doi:10.1039/d3cp04354a), 2023-01-01
Supplement: d3cp04354a1.pdf [file d3cp04354a1.pdf]

## Supporting Information

### **Gold(III) derivatives as the noncovalent interaction donors: theoretical study of the $\pi$ -hole regium bonds**

Jiajing Yan<sup>1</sup>, Yanli Zeng<sup>2</sup>, Lingpeng Meng<sup>1</sup>, Xiaoyan Li<sup>\*2</sup>, Xueying Zhang<sup>\*1</sup>

<sup>1</sup>*College of Chemistry and Materials Science, Hebei Normal University, Shijiazhuang, 050024, P.  
R. China.*

<sup>2</sup>*Hebei Key Laboratory of Inorganic Nano-materials, Hebei Normal University, Shijiazhuang,  
050024, P. R. China.*

#### **Table of contents:**

|         | page |
|---------|------|
| Fig. S1 | 2    |
| Fig. S2 | 3    |
| Fig. S3 | 3    |
| Fig. S4 | 4    |

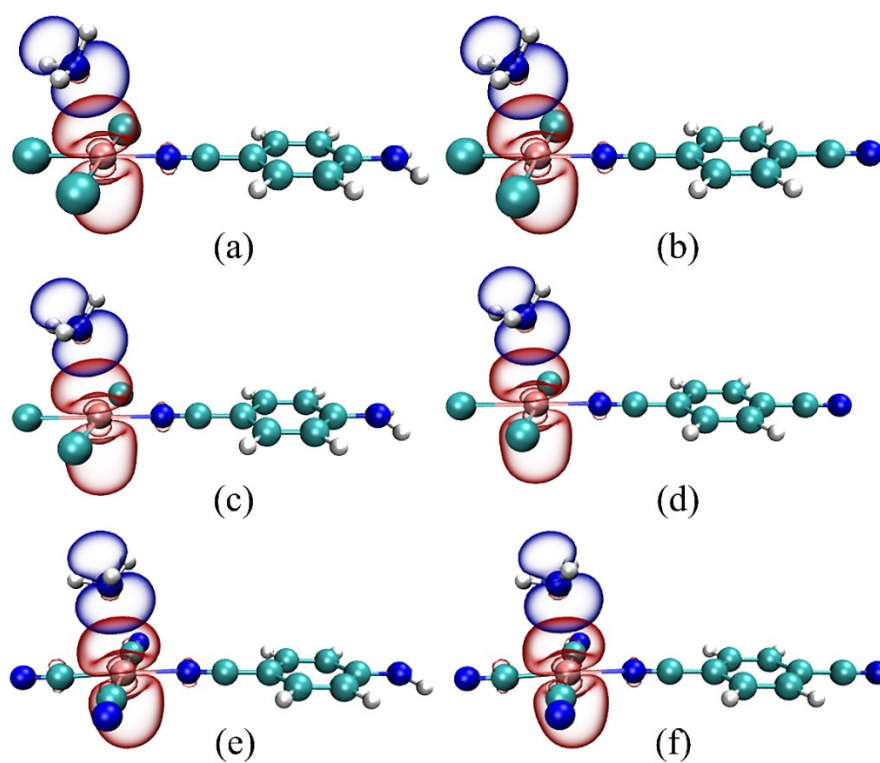

Fig. S1 Schematic diagrams of main orbital interactions. (a)  $1 \dots \text{NH}_3$ ; (b)  $5 \dots \text{NH}_3$ ; (c)  $6 \dots \text{NH}_3$ ; (d)  $10 \dots \text{NH}_3$ ; (e)  $11 \dots \text{NH}_3$ ; (f)  $15 \dots \text{NH}_3$ .

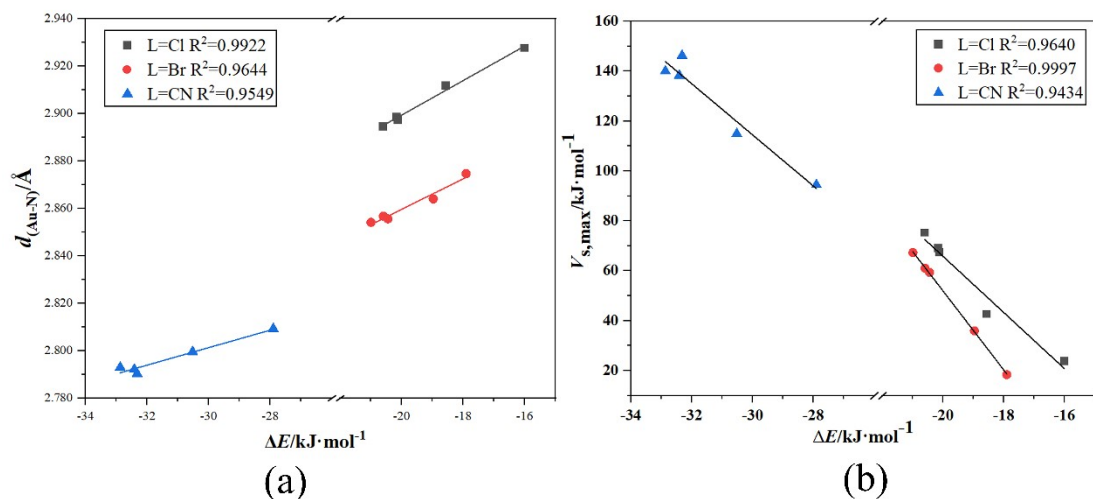

Fig. S2 (a) Correlation between the binding energy ( $\Delta E$ ) and the binding distance ( $d_{(\text{Au}\cdots\text{N})}$ ); (b) correlation between the binding energy ( $\Delta E$ ) and the MEP value over the Au atom ( $V_{s,\text{max}(\text{Au})}$ ).

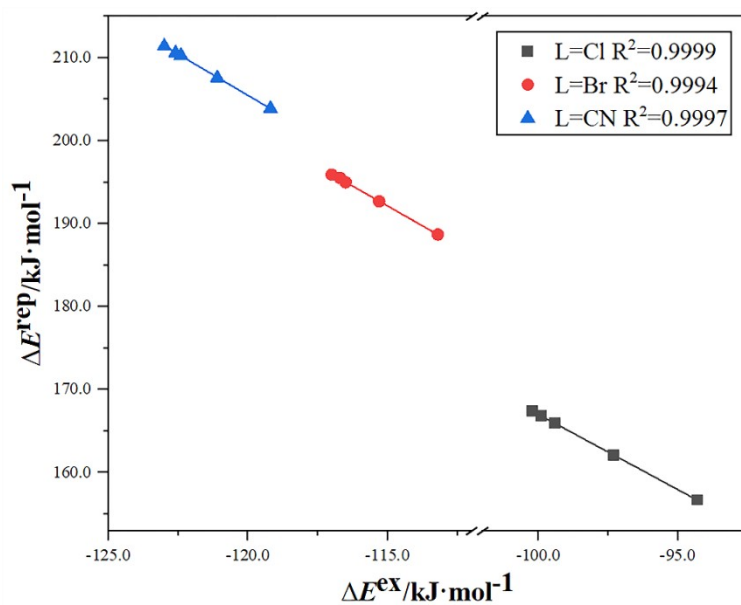

Fig. S3 Correlation between exchange energy ( $\Delta E^{\text{ex}}$ ) and repulsion energy ( $\Delta E^{\text{rep}}$ ).

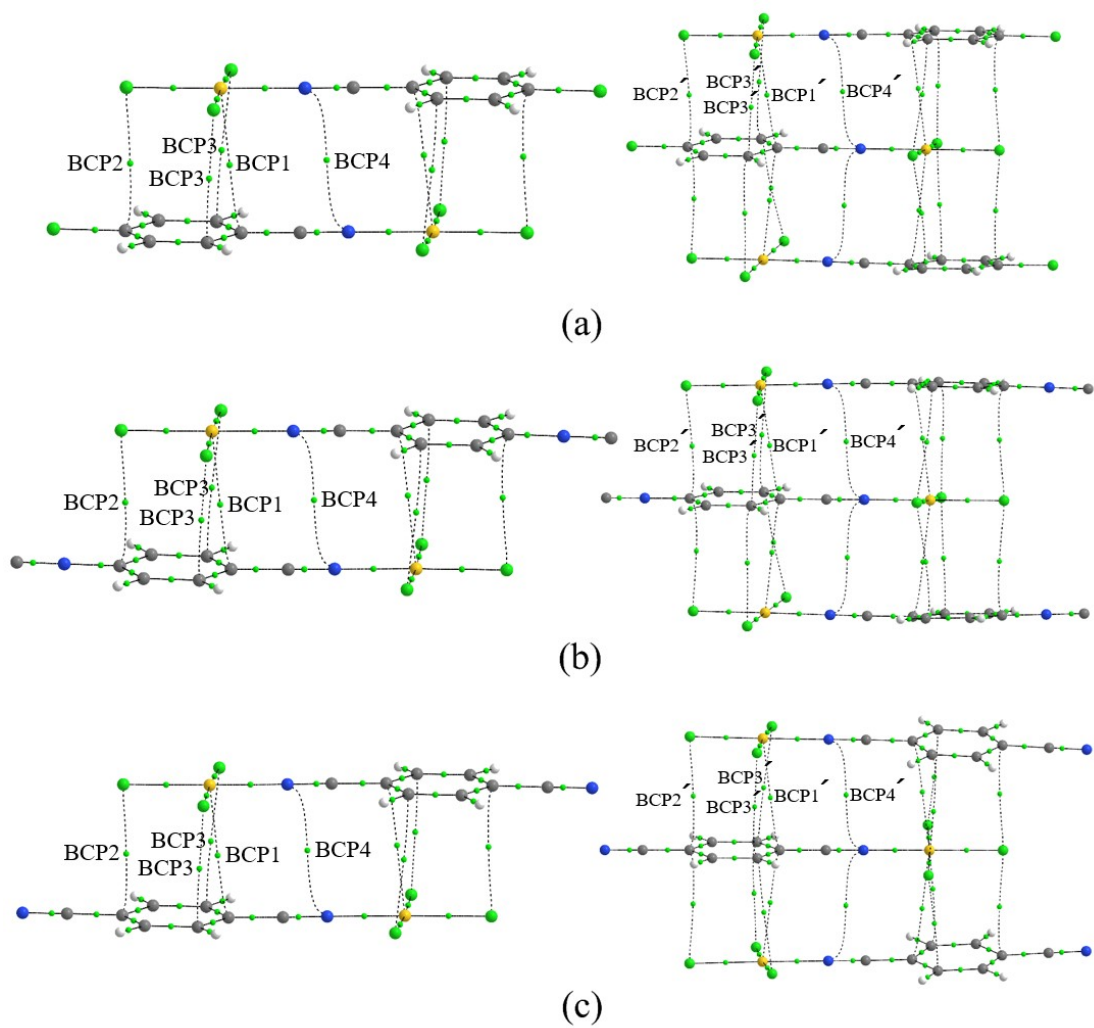

Fig. S4 AIM molecular graphs of the dimers and trimers (a)  $(\text{AuCl}_3(\text{NCC}_6\text{H}_4\text{Cl}))_n$  ( $n = 2, 3$ ); (b)  $(\text{AuCl}_3(\text{NCC}_6\text{H}_4\text{NC}))_n$  ( $n = 2, 3$ ); (c)  $\text{AuCl}_3(\text{NCC}_6\text{H}_4\text{CN})_n$  ( $n = 2, 3$ ).
